# Supplementary material
Source: Springer Nature journal article supplement (https://www.springermedizin.de/resource/supplementary/12891_2013_2113_MOESM1_ESM.pdf/9509446)
Supplement: MOESM1 [file 9509446]

## Characteristics

- related to the patients with LBP
- providers
- organizations
- systems

- vision
- resources
- structures
- practices

## Processes

Interprofessional  
practices

## Effects

- for the patients with LBP
- providers
- organizations
- systems
